# Supplementary material for: Effects of audio and visual distraction on patients’ vital signs and tolerance during esophagogastroduodenoscopy: a randomized controlled trial
Source: Springer Nature journal article supplement (doi:10.1186/s12876-020-01274-3), 2020-04-21
Supplement: MOESM1 [file 17915650]

# Protocol

Single-blind, prospective, randomized controlled trial.

Total enrolled subjects

- Control group : subjects sitting on the sofa
- Audio group : subjects sitting on the sofa while listening to music
- Visual group : subjects sitting on the sofa while watching a silent natural image
- Combination group : subjects sitting on the sofa and watching a natural image while listening to music

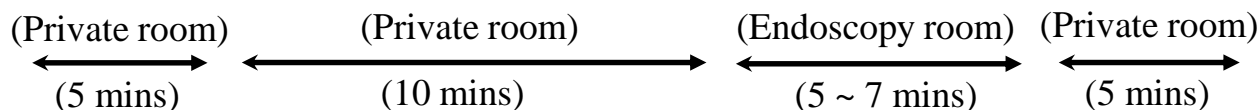

|                     | (Private room)<br>(5 mins) | (Private room)<br>(10 mins)   | (Endoscopy room)<br>(5 ~ 7 mins) | (Private room)<br>(5 mins) |
|---------------------|----------------------------|-------------------------------|----------------------------------|----------------------------|
| • Control group     | Rest                       | Rest                          | EGD                              | Rest                       |
| • Audio group       | Rest                       | Distraction (music)           | EGD                              | Rest                       |
| • Visual group      | Rest                       | Distraction (image)           | EGD                              | Rest                       |
| • Combination group | Rest                       | Distraction (music and image) | EGD                              | Rest                       |

Outcome

- The primary outcome
- Psychological factor (POMS, Impression of EGD)
  - Acceptance of distraction
- The secondary outcome
- Vital sign (PR, BP)
  - HRV (HF power, LF power/HF power)

(Survey components)

|                           |   |  |       |   |
|---------------------------|---|--|-------|---|
| Vital sign (PR, BP)       | ○ |  | ○ ○ ○ | ○ |
| HRV (HF, LF power)        | ○ |  | ○ ○ ○ | ○ |
| POMS                      | ○ |  | ○     |   |
| Impression for EGD        | ○ |  | ○     |   |
| Acceptance of distraction |   |  |       | ○ |
